# Supplementary material for: LRRK2 activation controls the repair of damaged endomembranes in macrophages
Source: PubMed Central journal article supplement (PMC7507578; doi:10.15252/embj.2020104494), 2020-07-09
Supplement: EMBJ-39-e104494-s001.pdf [file EMBJ-39-e104494-s001.pdf]

## **APPENDIX**

### **TABLE OF CONTENTS**

**Figure legend for appendix Fig. S1**

**Appendix figure S1**

**Appendix table S1**

**Appendix table S2**

### **Appendix Fig. S1. Imaging controls for Fig. 3.**

**(A)** RAW264.7 macrophages were electroporated with EGFP-Rab8A and stained for Galectin-3, CHMP4B and LC3B. Scale bar = 5  $\mu$ m.

**(B)** RAW264.7 macrophages were treated with 1 mM of LLOMe and appearance of LRRK2, Rab8A, CHMP4B, Galectin-3 and LC3B foci over time was visualised by immunofluorescence and high-content imaging. Scale bar = 10  $\mu$ m.

Appendix Fig. S1

A

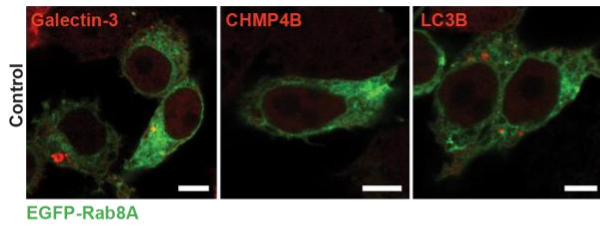

B

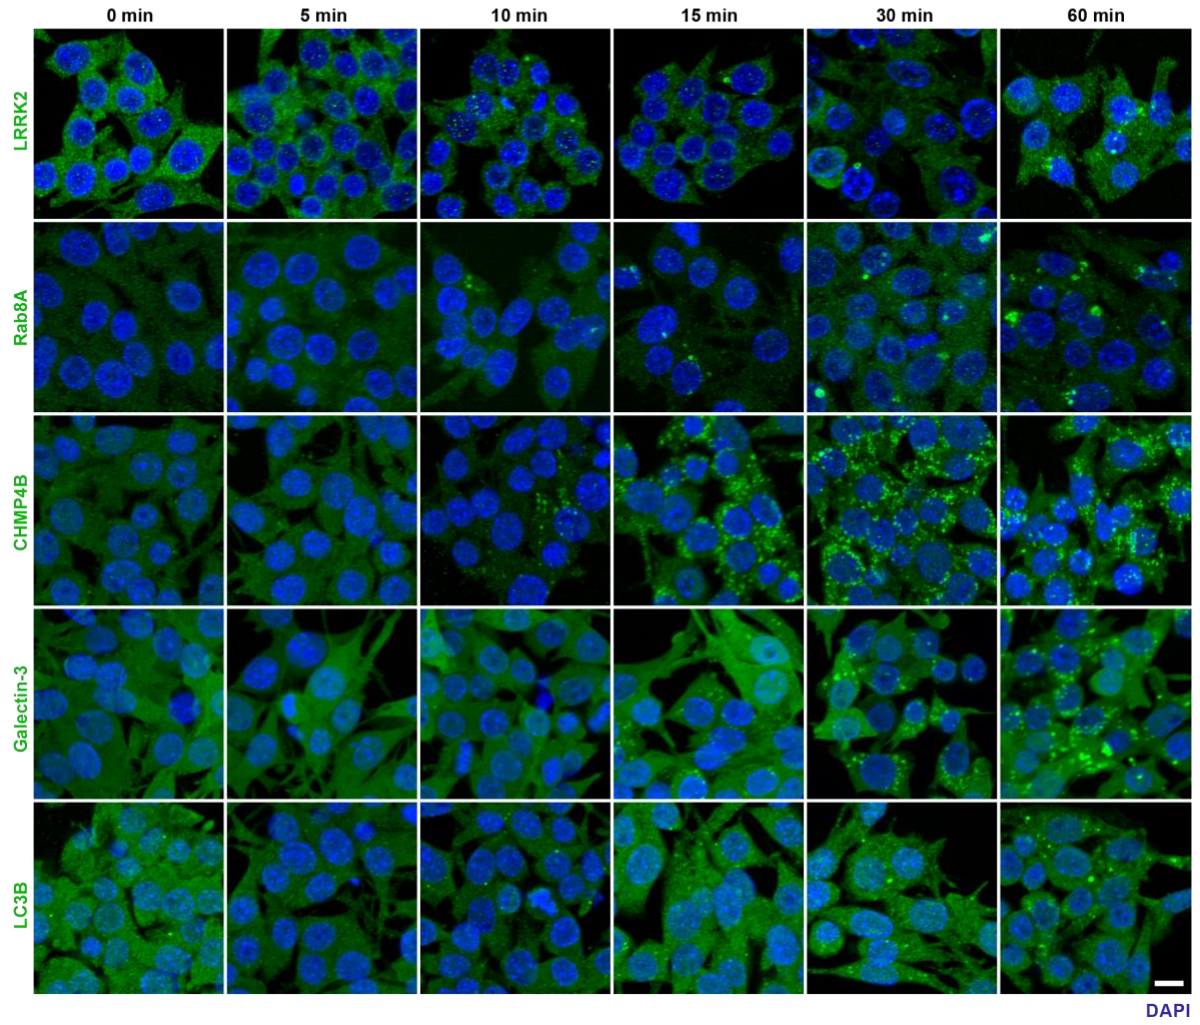

**Appendix table S1: Blood donor demographics and clinical information**

|                     | Sex | Age at Entry        | Age at Onset (AAO) | Disease Duration (years) | Hoehn and Yahr Stage | Mutation                |
|---------------------|-----|---------------------|--------------------|--------------------------|----------------------|-------------------------|
| PD_1                | M   | 64.0                | 56                 | 8.0                      | 2                    | p.R1441C                |
| PD_2                | F   | 65.4                | 58                 | 7.4                      | 2                    | p.G2019S                |
| PD_3                | F   | 66.1                | 54                 | 12.1                     | 2                    | p.G2019S                |
| <i>Average (SD)</i> | -   | <i>65.17 (1.07)</i> | <i>56.0 (2.0)</i>  | <i>9.17 (2.56)</i>       | -                    | -                       |
| Control_1           | M   | 64.6                | -                  | -                        | 0                    | No PD variants detected |
| Control_2           | F   | 64.7                | -                  | -                        | 0                    | No PD variants detected |
| Control_3           | M   | 72.8                | -                  | -                        | 0                    | No PD variants detected |
| <i>Average (SD)</i> | -   | <i>67.37 (4.71)</i> | -                  | -                        | -                    | -                       |

**Appendix table S2: Pathogenic Parkinson's Disease variants screened for during genotyping**

|              |             |             |             |
|--------------|-------------|-------------|-------------|
| LRRK2_G2019S | PARK2_E79X  | PARK2_E395X | PINK1_A168P |
| LRRK2_R1441C | PARK2_M192L | PARK2_A398T | PINK1_R246X |
| LRRK2_Y1699C | PARK2_K211N | PARK2_E409X | PINK1_Y258X |
| LRRK2_I2020T | PARK2_C212G | PARK2_G429E | PINK1_T313M |
| PARK2_M1L    | PARK2_R234Q | PARK2_G430D | PINK1_W437X |
| PARK2_A31D   | PARK2_V258M | PARK7_L166P | PINK1_G440E |
| PARK2_R33Q   | PARK2_D280N | PINK1_Q456X | SNCA_A30P   |
| PARK2_Q40X   | PARK2_C289G | PINK1_R464H | SNCA_E46K   |
| PARK2_R42H   | PARK2_Q311H | PINK1_R492X | SNCA_A53T   |
| PARK2_R42P   | PARK2_T351P | PINK1_C92F  | PARK2_R275W |
| PARK2_V56E   | PARK2_G359D | PINK1_Q129X | VPS35_D620N |
