# Supplementary material for: LRRK2 activation controls the repair of damaged endomembranes in macrophages
Source: PubMed Central journal article supplement (PMC7507578; doi:10.15252/embj.2020104494), 2020-07-09

**Figure 2**

**A**

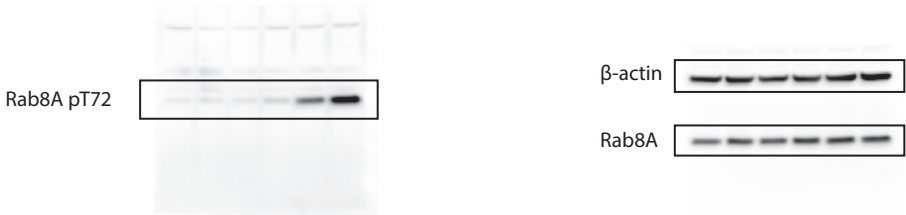

**B**

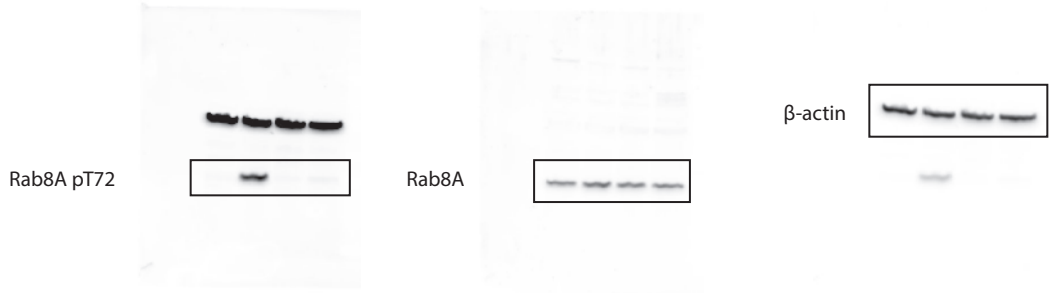

**C**

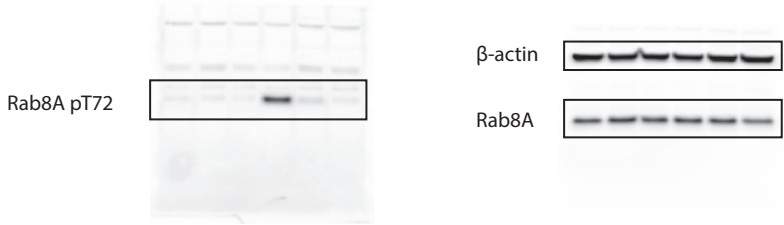

Supplement: EMBJ-39-e104494-s005.pdf [file EMBJ-39-e104494-s005.pdf]
