# Supplementary material for: LRRK2 activation controls the repair of damaged endomembranes in macrophages
Source: PubMed Central journal article supplement (PMC7507578; doi:10.15252/embj.2020104494), 2020-07-09

**Figure 3E**

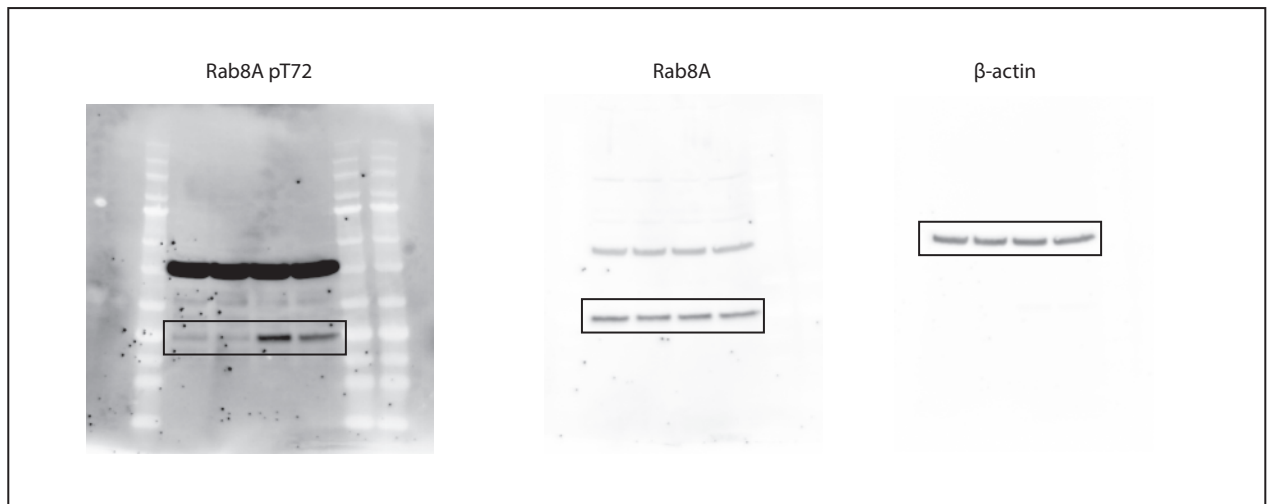

Supplement: EMBJ-39-e104494-s006.pdf [file EMBJ-39-e104494-s006.pdf]
